# Supplementary material for: An automated decision-making procedure for ranking and selecting species in biodiversity projects
Source: Research Square preprint supplement (doi:10.21203/rs.3.rs-7957242/v1), 2025-11-24
Supplement: Supplementary file 1 [file 736be575f5926c561e011fbe.xlsx]

## Sheet: Sheet1
Criterion	Explanation	Threshold
Stage 1 - No-go criteria
Availability of published reference genomes	A genome is considered a reference genome given the EBP criteria, specifically, contig N50 > 1 Mb, scaffoldN50 > 10 Mb (with exceptions where chromosomal N50 < 10 Mb), chromosomal, and BUSCO > 90%.	Such species are excluded.
Redundancy	Species for which a high-quality genome that meets the EBP minimum standard is in process of being generated, e.g., by other consortia such as DToL or EBP-Nor.	Such species are excluded.
Availability of voucher specimen	The voucher specimen should be ideally what is left of the specimen after extractions for DNA, RNA and Hi-C. These remains should enable morphological identification. For small species that are completely consumed in the extraction, a proxy voucher from the same clone or population (collection event), and if relevant of the same sex, should be provided. A photo of the original specimen should be …	Species without such a voucher are excluded.
Stage 2. Species ranking criteria.
Certainty of species identification (1)	As the goal of EBP is to sequence reference genomes for all eukaryotic species, the species need to be identified with certainty. The certainty of the identification needs to be indicated (e.g., known taxonomic problems with the taxon, cryptic species complex) and the procedure of identification (e.g., four-eyes principle, available relevant keys for the region, taxonomic expert named, barcode pr…	Priority is given to species that have been identified with a high degree of certainty.
Type locality (2)	Specimens close to the type locality are taxonomically preferable as they are more likely to be genetically close to the type specimen of the species and hence its name bearer.	It is advantageous if the species can be collected at least close to the type locality.
Taxonomic representation on Tree of Life (3)	EBP has as its first goal to sample and generate reference genomes for family representatives and BGE has also the goal to provide a broad representation of biodiversity. For some species, the taxonomic level of relationship to the closest relative with a sequenced reference genome is, for example, within the same genus, family, order or phylum.	Priority will be given to species representing higher taxonomic groups with no or few reference genomes. For incertae sedis taxa, the species shall be placed at the highest known certain taxonomic placement of the species and the taxonomic level be assessed based on that placement.
A minimum of one species per country (4)	ERGA as a European-wide society and BGE as an EU consortium aim at generating reference genomes and increasing competence in genomic methods for the whole of Europe.	Biodiversity shall be sampled across Europe with at least one species per country, according to the sample site. To ensure inclusivity a requirement for the fulfilment of this criterion is that the genome team includes people from the country where the sample is to be collected.
Countries with fewer genomic resources (5)	Countries with low generation capacity of high-quality genomes (e.g., below a certain %GDP investment in R&D, lack of appropriate sequencing facilities or bioinformatics infrastructure, fewer genomic publications) should be prioritised over countries with greater capacities. The EU has the same inclusivity goals in its COST actions with the Inclusiveness Target Countries (ITC) and with the Wideni…	The Widening country list is used for prioritisation in this criterion.
Novel sample coordinator (6)	The goal of BGE/ERGA is also to ensure that the benefit of generating reference genomes and competence building is not only distributed across the European countries, but also across individual researchers. This criterion is similar to the incentive the EU-Assemble and EU-Assemble+ programs had.	Proposers who have not already gotten a species sequenced via BGE resources in a leading role are prioritised.
Gender of researcher or gender balance of team (7)	ERGA aims to follow the Justice, Equity, Diversity, Inclusion (JEDI) principles and increase the inclusiveness and diversity of the genome teams. ERGA wants to empower especially gender diversity in leading roles of genome teams.	Female sample coordinators get precedence.
Researcher of underrepresented minority (8)	Increasing diversity does not only apply to gender, but also to other equity-deserving (also known as ‘underrepresented’) groups in the genomics community. Such groups can be for example Black people, Indigenous people, People of Colour, Roma, and refugees.	Sample coordinators from such groups get precedence.
Diversity & inclusiveness of team (9)	Diversity and inclusiveness should not only be represented in the leadership position, but also in the genome team itself. Moreover, BGE/ERGA aims to broaden the impact of the generated genomes by including non-scientific stakeholders.	Genome teams having support from non-scientific interest groups or organisations (e.g., NGO, indigenous council) or representatives from these are prioritized. Similarly, priority is given to genome teams comprising disabled/handicapped people or citizen scientists.
Application of the genomes (10)	The generation of reference genomes should not be an aim by itself, but also benefit the larger scientific and non-scientific community. The faster such an impact can be generated the better for the visibility of the goals and sensibility of the EBP approach in general.	Genomes that shortly after publication will be used in research beyond the genome team are prioritised over ones with a longer time frame, as those genomes can be sequenced later.
Reach/breadth of community (11)	Besides a quick application of the reference genomes, it also is beneficial if the genomes are used by a variety of stakeholders and communities, increasing the reach and breadth of the application of genomic resources.	The more communities/stakeholders will benefit from the genome, the higher the priority.
Stage 3. Feasibility criteria.
Genome size	The project aims to sequence all species but recognizes that generation of reference genomes from species with very large genomes will consume significant shared resources and will limit the overall number of species sequenced. Moreover, very large genome sizes are still methodologically demanding with the amount of High Molecular Weight DNA needed.	Species with a haploid genome size above 6 Gb are regarded as not feasible and excluded.
Sample availability	Sample acquisition is a critical step in the process, and excessive delays will jeopardise delivery across the whole project. The project needs to deliver to its stated aims.	Species for which samples are already available with the collectors or can be easily collected are included.
Species abundance and access	The successful collection of species depends on its abundance and accessibility. The more abundant a species is and the more accessible (e.g., not in remote locations), the easier it is to collect.	If the proposed species still needs to be collected, only species were considered that are abundant and easily accessible.
Number of samples and sampling across tissues	The generation of reference genomes generally proceeds from samples of a single individual. Since some species have small specimens, generating all three kinds of data (long read, long range and transcriptome) can be difficult. In the case of small specimens, it is acceptable to sequence transcriptomes from secondary specimens. It is also possible, but less optimal, to sequence Hi-C long range da…	Only species for which multiple specimens, with perhaps multiple samples per specimen are available, were included.
Size of sample	The intention is to assemble genomes from single individuals, and thus sufficient extractable DNA from a single sample or specimen is required for at least long read data generation.	Because of current processing technical limitations, the minimum sample size is about “fly sized” (Drosophila), or 100,000 nucleated cells.
Method of preservation	Good genomes cannot be generated from poor specimens, and BGE/ERGA thus considers specimens as feasible that have been collected and preserved in a manner that assures excellent maintenance of DNA and RNA (and nuclear) integrity. At present, snap frozen or samples frozen on dry ice or ethanol/dry ice slurry are superior in quality than samples that have been lyophilized, air dried or preserved in…	The samples must be snap frozen from live tissue in liquid nitrogen or on dry ice.
Sample preserved suitable for Hi-C	Generation of Hi-C long range data requires preservation of intact nuclei and thus samples for Hi-C must use compatible storage methods.	The same feasibility assessment as for “Method of preservation” applies.
Time elapsed from death to preservation	Some organisms may be held alive in captivity/culture for a period of time. This is not what is meant here, but rather the time that has passed since the sacrifice of the specimen to final preservation. The shorter the time span, the better.	The specimen should be sacrificed directly by snap freezing or sacrificed and snap frozen immediately (meaning <5 mins).
Sample preserved suitable for transcriptome sequencing	Samples must be preserved in a way suitable for transcriptomics (Illumina RNAseq or Iso-seq).	The same feasibility assessment as for “Method of preservation” applies.
Storage of sample	The storage of samples between preservation and extraction is essential for high quality DNA, RNA and nuclear work. BGE/ERGA considers only samples that have a validated cold chain of storage since preservation as feasible.	The samples must have been maintained in a validated lower than -70°C cold chain throughout.
